# Supplementary material
Source: Royal Society of Chemistry journal article supplement (doi:10.1039/d5bm00916b)

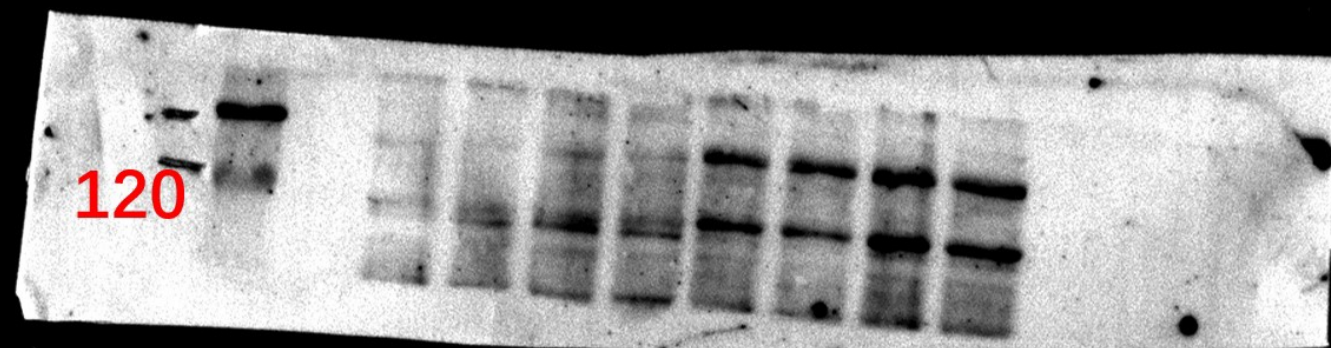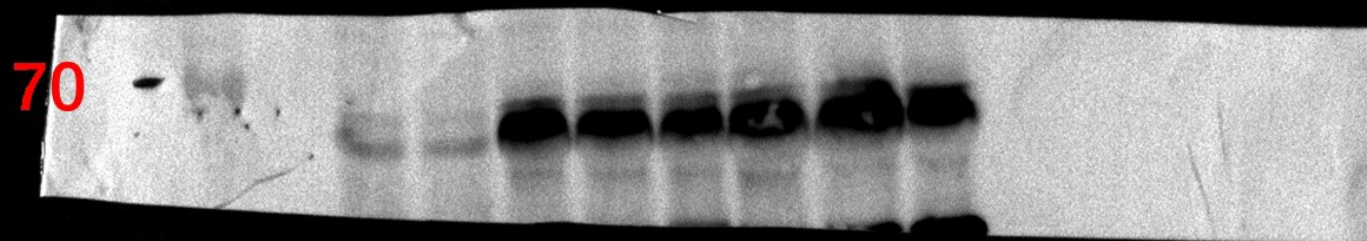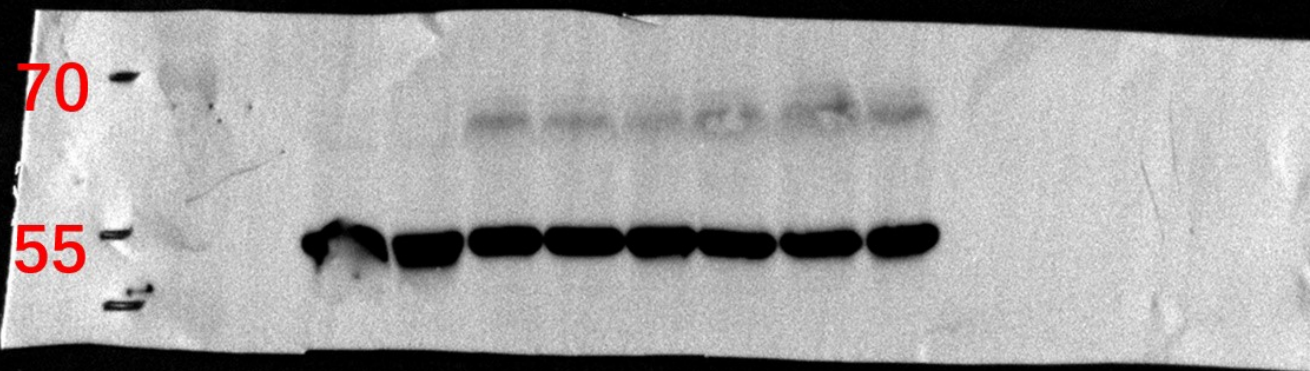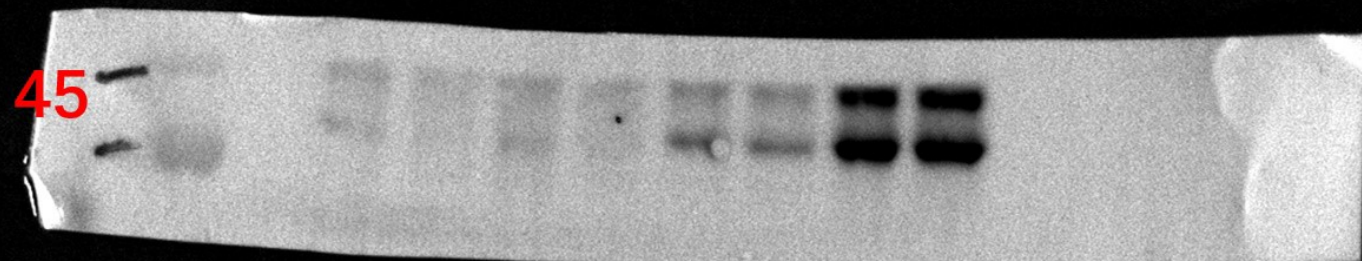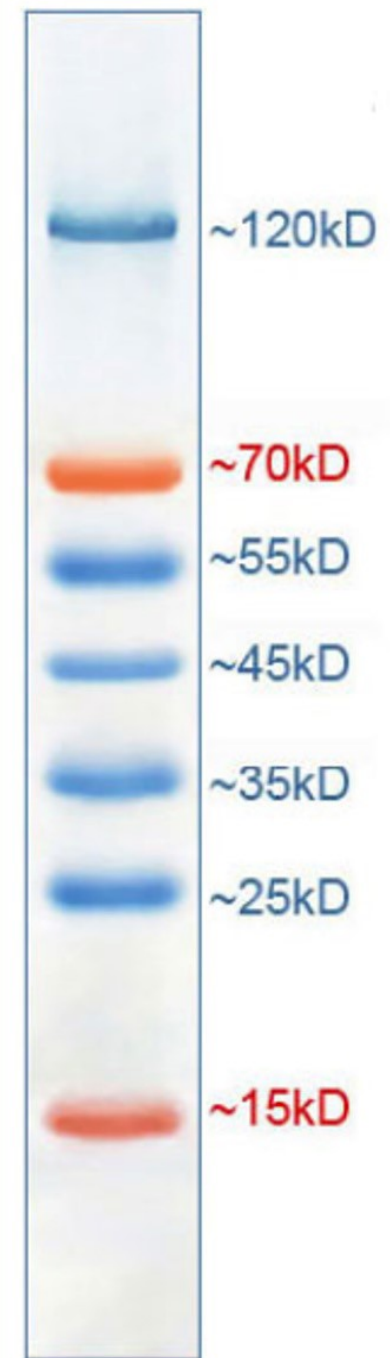

Supplement: d5bm00916b1.pdf [file d5bm00916b1.pdf]

20240403 IPF mouse

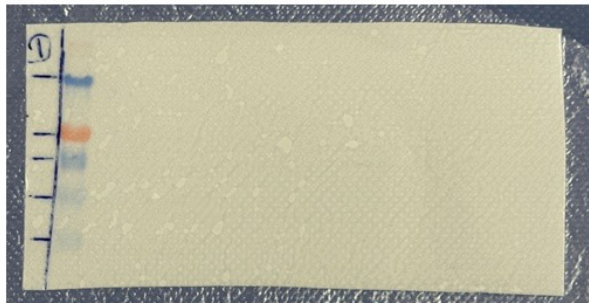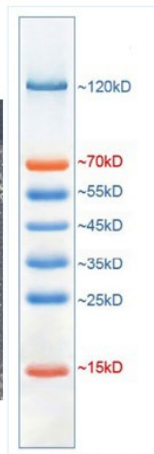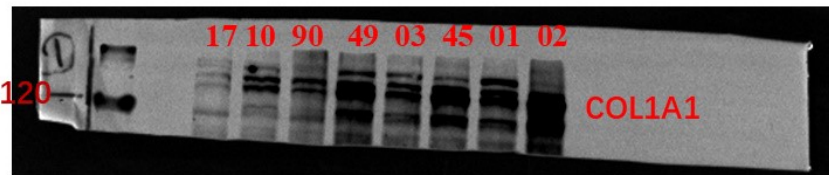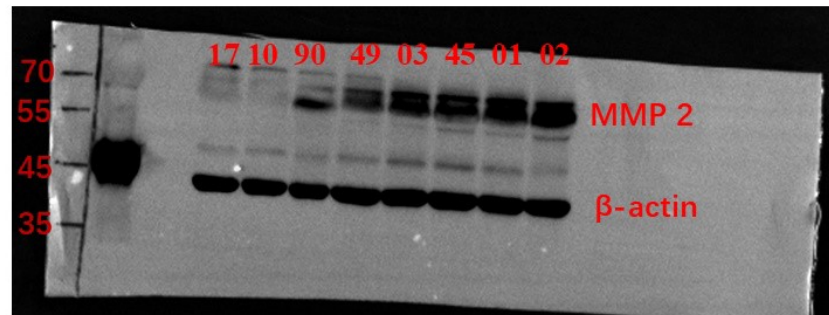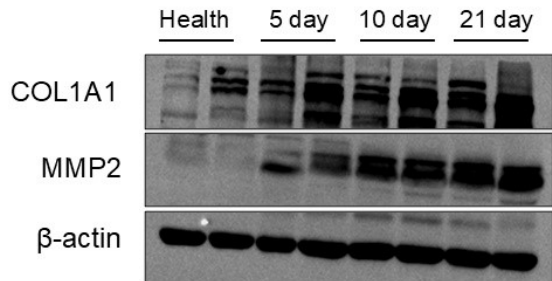

Supplement: d5bm00916b2.pdf [file d5bm00916b2.pdf]
